# Supplementary material
Source: ML conference proceedings conference paper supplement (https://proceedings.neurips.cc/paper_files/paper/2023/hash/96aca14d6c4dcd3adf54bc2c5ad7f138-Abstract.html)
Supplement: Supplementary file 1 [file 96aca14d6c4dcd3adf54bc2c5ad7f138-Supplemental-Conference.zip]

Archive with 4 entries (4 files):
- artic3d_video.mp4
- __MACOSX/._artic3d_video.mp4
- artic3d_neurips23_supp.pdf
- __MACOSX/._artic3d_neurips23_supp.pdf
